# Supplementary material for: An anomalous ferroelastic phase transition arising from an unusualcis-/anti-conformational reversal of polar organic cations
Source: Royal Society of Chemistry journal article supplement (doi:10.1039/d3sc01101a), 2023-01-01
Supplement: d3sc01101a3.pdf [file d3sc01101a3.pdf]

## *Supporting Information*

### **An anomalous ferroelastic phase transition arising from an unusual *cis-/anti*-conformational reversal of polar organic cations**

Bing-Qing Zhao, Xiao-Xian Chen, Hui Ye, Ya-Ping Gong, Jun Wang, Le Ye and Wei-Xiong Zhang\*

MOE Key Laboratory of Bioinorganic and Synthetic Chemistry, School of Chemistry and Chemical Engineering, Sun Yat-Sen University, Guangzhou 510275, China.

E-mail: [zhangwx6@mail.sysu.edu.cn](mailto:zhangwx6@mail.sysu.edu.cn)

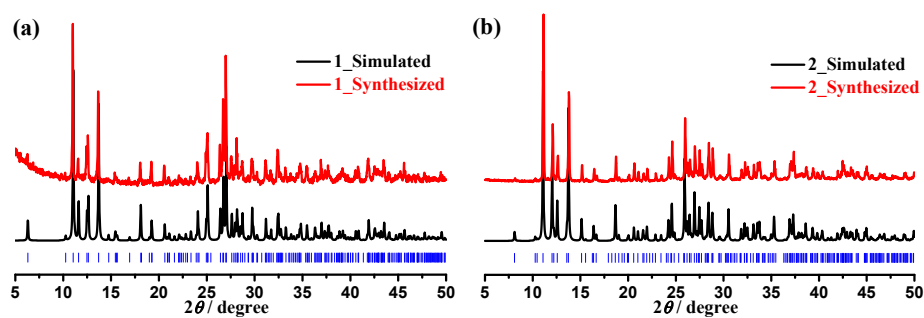

Fig. S1 Experimental (red) and simulated (black) PXRD patterns for **1** (a) and **2** (b).

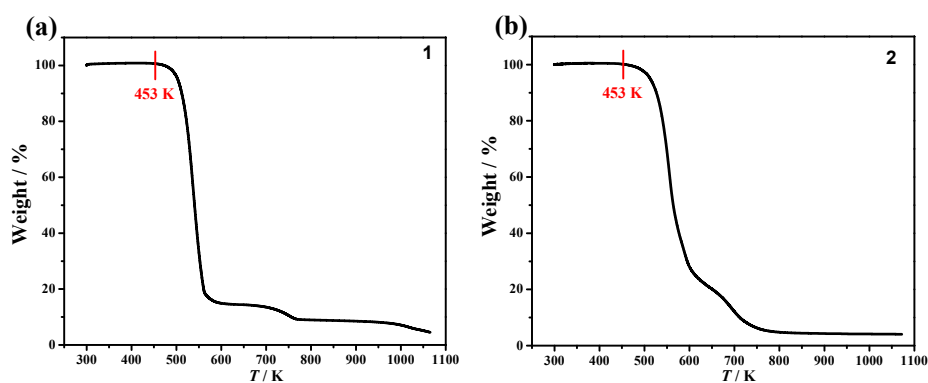

Fig. S2 Thermogravimetric analyses for **1** (a) and **2** (b).

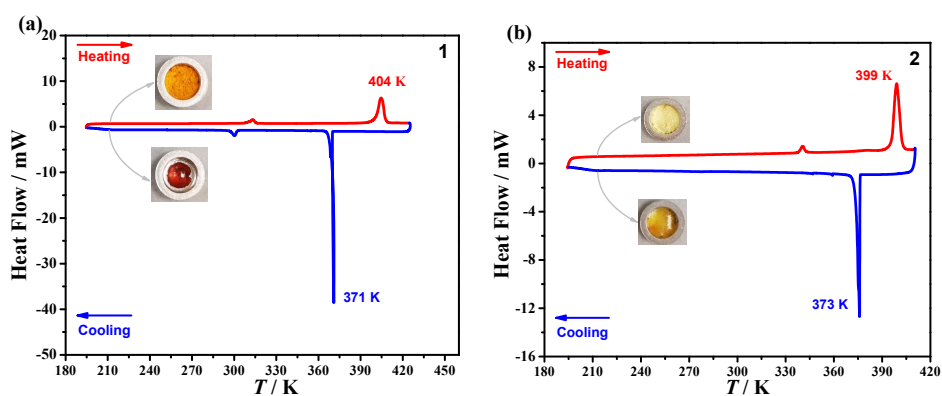

Fig. S3 DSC curves of melting and solidification for **1** (a) and **2** (b).

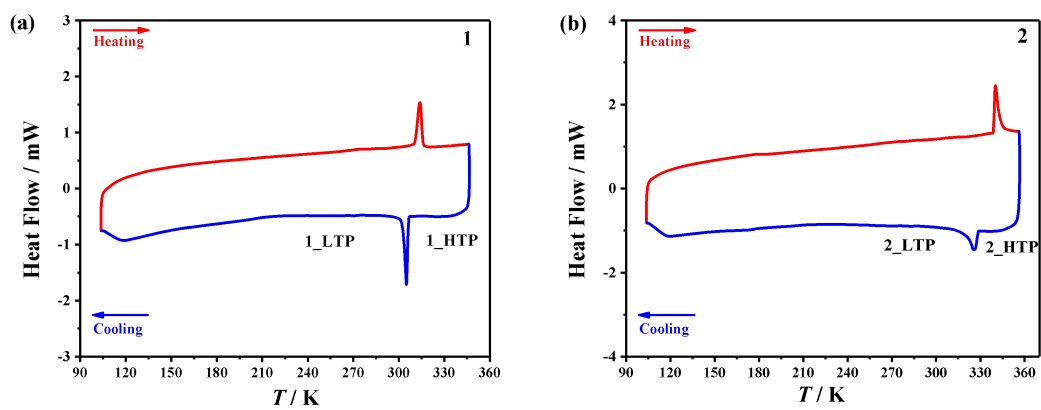

Fig. S4 DSC curves of **1** (a) and **2** (b) at a temperature as low as 120 K.

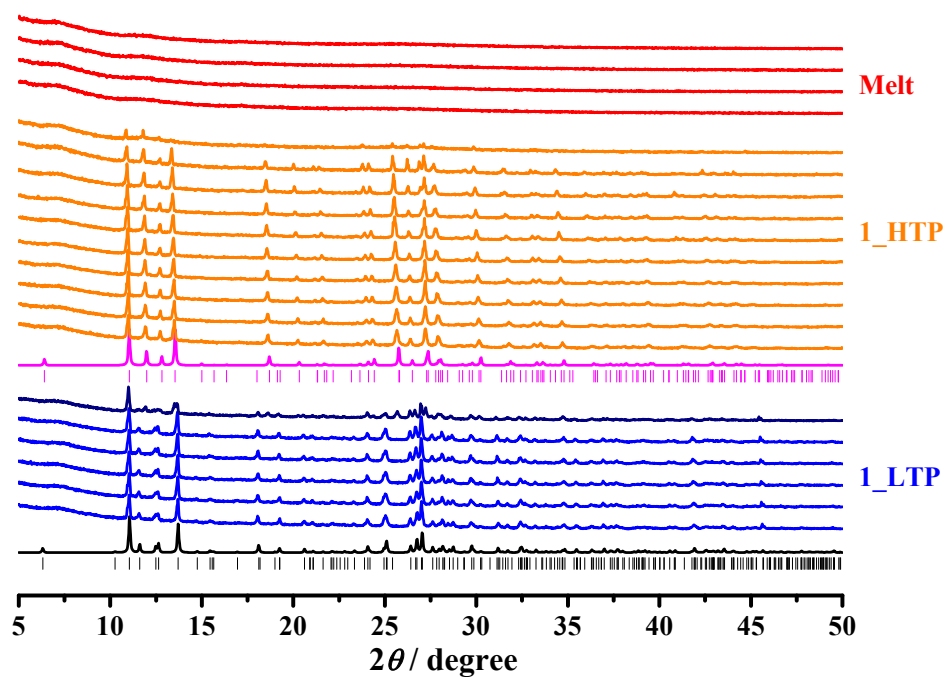

Fig. S5 The variable-temperature experimental PXRD patterns of **1** and the simulated patterns based on single-crystal structures for **1\_LTP** and **1\_HTP** phases.

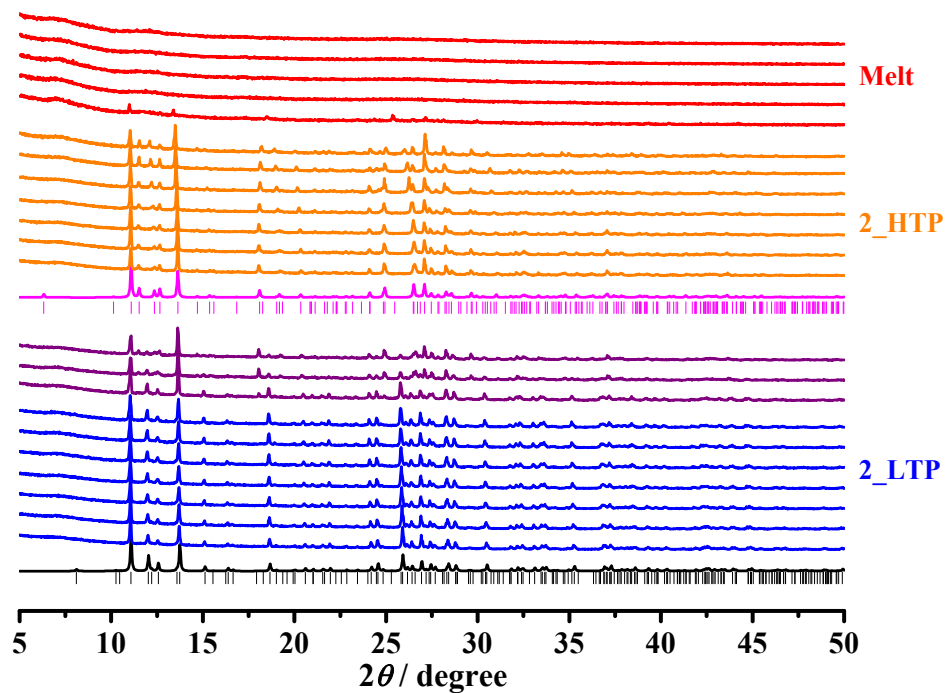

**Fig. S6** The variable-temperature experimental PXRD patterns of **2** and the simulated patterns based on single-crystal structures for **2\_LTP** and **2\_HTP** phases.

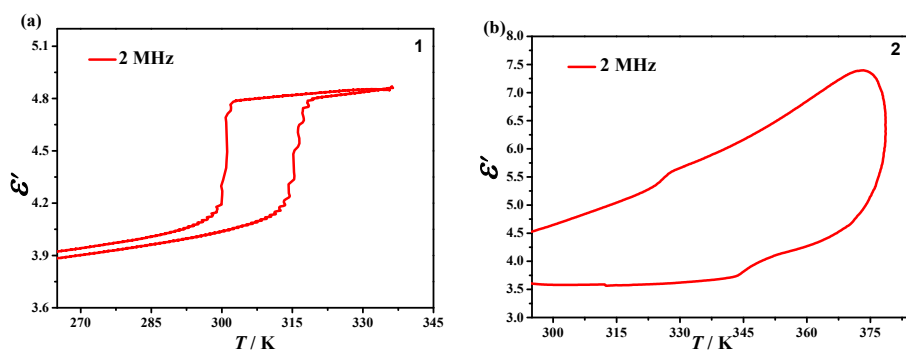

**Fig. S7** The real part of dielectric permittivity of **1** (a) and **2** (b) during a cooling–heating cycle measured under an ac electric field with a frequency of 2 MHz.

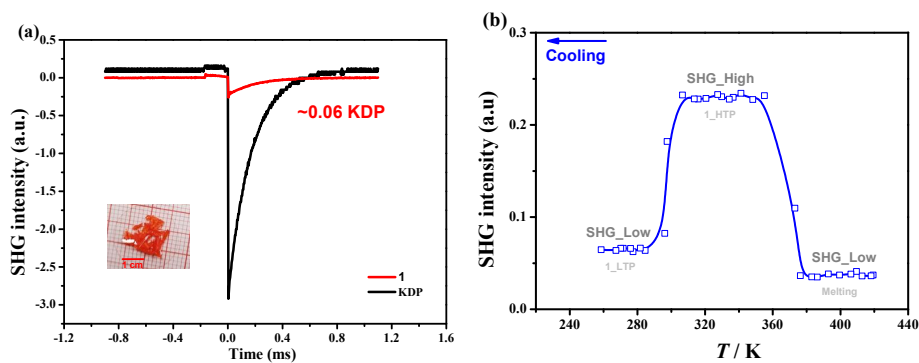

**Fig. S8** (a) Oscilloscope traces of SHG signals of **1** and the referential KDP. (b) The Temperature-dependence of SHG signal in the cooling process after melting for **1**.

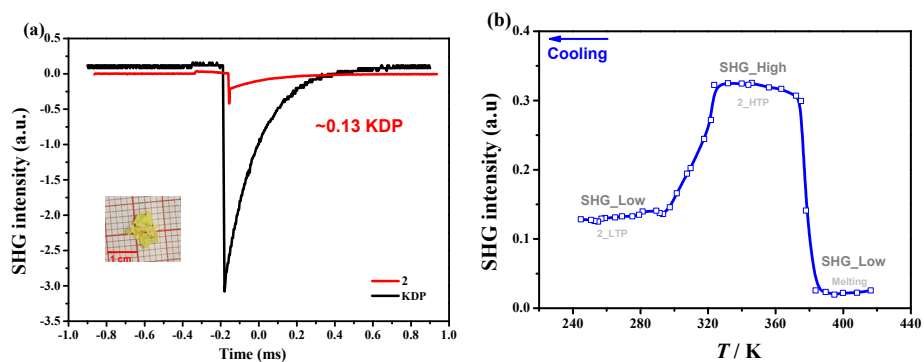

**Fig. S9** (a) Oscilloscope traces of SHG signals of **2** and the referential KDP. (b) The Temperature-dependence of SHG signal in the cooling process after melting for **2**.

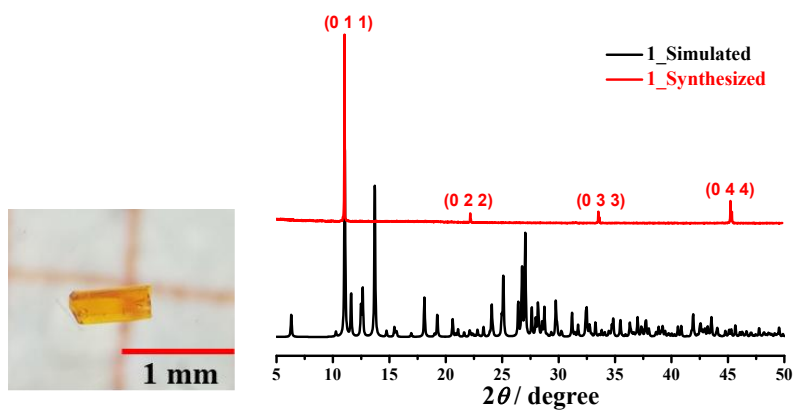

**Fig. S10** The morphology of the single crystal of **1** (left) and X-ray diffraction patterns (right) measured on the largest plane of single crystal for observation of ferroelastic domains.

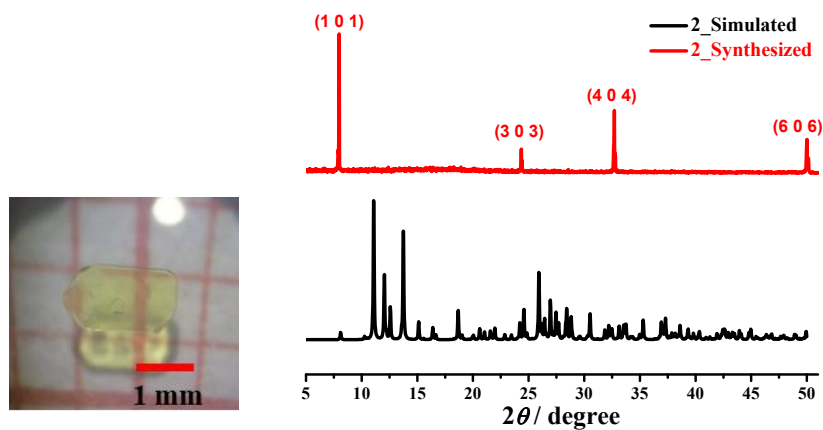

**Fig. S11** The morphology of the single crystal of **2** (left) and X-ray diffraction patterns (right) measured on the largest plane of single crystal for observation of ferroelastic domains.

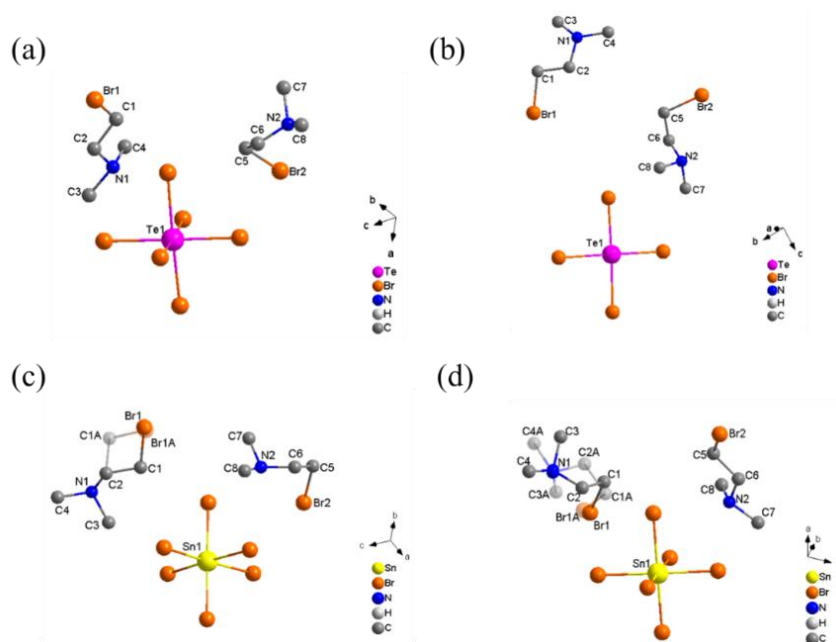

**Fig. S12** The asymmetric units of **1\_LTP** (a), **1\_HTP** (b), **2\_LTP** (c), and **2\_HTP** (d).

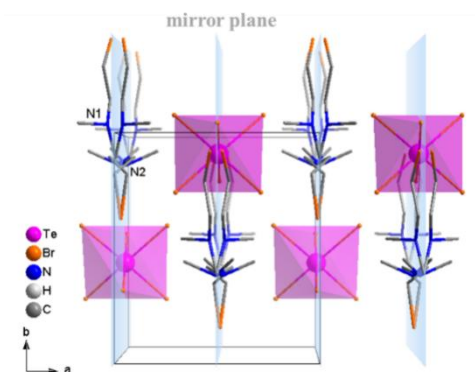

**Fig. S13** The organic cations show 2-fold disorder about the crystallographic mirror plane (shown in the light blue plane) perpendicular to the *a* axis in **1\_HTP** phase.

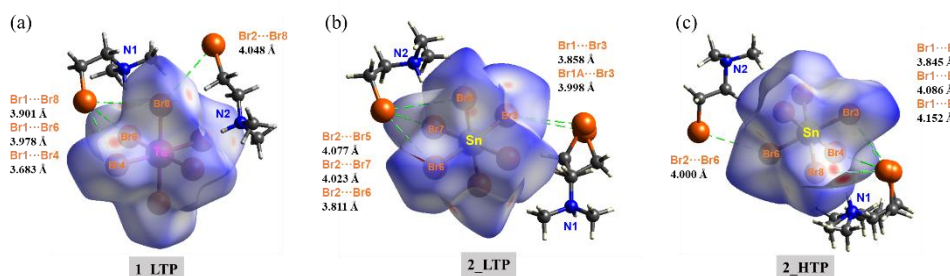

**Fig. S14** Hirshfeld surfaces for the Br...Br contacts and distances between the organic cation and inorganic anions in **1\_LTP** (a), **2\_LTP** (b), and **2\_HTP** (c).

**Table S1.** Pawley refinement results on the variable-temperature PXRD patterns of **1**.

|              | <i>T</i> /K | <i>a</i> /Å | <i>b</i> /Å | <i>c</i> /Å | $\beta$ /° | <i>V</i> /Å <sup>3</sup> | <i>R</i> <sub><i>P</i></sub> /% | <i>R</i> <sub><i>WP</i></sub> /% |
|--------------|-------------|-------------|-------------|-------------|------------|--------------------------|---------------------------------|----------------------------------|
| <b>1_LTP</b> | 273         | 8.602(1)    | 9.7260(1)   | 14.038(1)   | 95.043(2)  | 1169.92                  | 2.74                            | 3.61                             |
|              | 283         | 8.621(1)    | 9.739(1)    | 14.056(2)   | 94.982(2)  | 1175.79                  | 2.77                            | 3.67                             |
|              | 293         | 8.639(1)    | 9.752(1)    | 14.068(1)   | 94.874(2)  | 1180.92                  | 2.74                            | 3.62                             |
|              | 303         | 8.659(1)    | 9.766(1)    | 14.080(1)   | 94.722(3)  | 1186.63                  | 2.76                            | 3.62                             |
|              | 308         | 8.671(1)    | 9.776(1)    | 14.086(1)   | 94.594(2)  | 1190.32                  | 2.87                            | 3.80                             |
| <b>1_HTP</b> | 318         | 8.765(3)    | 9.858(3)    | 13.895(4)   | 90         | 1200.60                  | 2.87                            | 3.81                             |
|              | 323         | 8.774(1)    | 9.869(1)    | 13.900(1)   | 90         | 1203.66                  | 2.86                            | 3.91                             |
|              | 328         | 8.782(1)    | 9.876(1)    | 13.904(1)   | 90         | 1205.91                  | 2.72                            | 3.74                             |
|              | 333         | 8.789(1)    | 9.881(1)    | 13.908(1)   | 90         | 1207.88                  | 2.77                            | 3.81                             |
|              | 338         | 8.796(1)    | 9.888(1)    | 13.915(1)   | 90         | 1210.29                  | 2.81                            | 3.72                             |

**Table S2.** Pawley refinement results on the variable-temperature PXRD patterns of **2**.

|              | <i>T</i> /K | <i>a</i> /Å | <i>b</i> /Å | <i>c</i> /Å | $\beta$ /° | <i>V</i> /Å <sup>3</sup> | <i>R</i> <sub><i>P</i></sub> /% | <i>R</i> <sub><i>WP</i></sub> /% |
|--------------|-------------|-------------|-------------|-------------|------------|--------------------------|---------------------------------|----------------------------------|
| <b>2_LTP</b> | 303         | 17.229(1)   | 9.687(1)    | 14.066(1)   | 90         | 2347.66                  | 2.90                            | 3.85                             |
|              | 308         | 17.240(1)   | 9.690(1)    | 14.072(1)   | 90         | 2350.89                  | 2.88                            | 3.85                             |
|              | 313         | 17.255(1)   | 9.694(1)    | 14.076(1)   | 90         | 2354.71                  | 2.82                            | 3.72                             |
|              | 318         | 17.264(1)   | 9.697(1)    | 14.079(1)   | 90         | 2357.00                  | 2.70                            | 3.55                             |
|              | 323         | 17.276(1)   | 9.700(1)    | 14.082(1)   | 90         | 2360.05                  | 2.70                            | 3.55                             |
|              | 328         | 17.289(1)   | 9.703(1)    | 14.087(1)   | 90         | 2363.35                  | 2.78                            | 3.66                             |
|              | 333         | 17.302(1)   | 9.707(1)    | 14.090(1)   | 90         | 2366.54                  | 3.31                            | 4.53                             |
|              | 338         | 17.317(1)   | 9.710(1)    | 14.095(1)   | 90         | 2369.89                  | 3.04                            | 4.15                             |
| <b>2_HTP</b> | 348         | 8.743(1)    | 9.705(1)    | 14.025(1)   | 94.767(2)  | 1185.91                  | 4.26                            | 6.14                             |
|              | 353         | 8.753(1)    | 9.718(1)    | 14.031(1)   | 94.681(2)  | 1189.47                  | 3.48                            | 4.80                             |
|              | 356         | 8.762(1)    | 9.726(1)    | 14.034(1)   | 94.626(2)  | 1192.13                  | 3.63                            | 5.14                             |
|              | 358         | 8.769(1)    | 9.729(1)    | 14.038(1)   | 94.586(2)  | 1193.79                  | 3.62                            | 5.17                             |
|              | 361         | 8.778(1)    | 9.734(1)    | 14.041(1)   | 94.507(2)  | 1196.02                  | 4.13                            | 6.10                             |
|              | 363         | 8.786(1)    | 9.7380(2)   | 14.043(1)   | 94.449(3)  | 1197.94                  | 4.42                            | 6.61                             |

**Table S3.** Linear fitting results of the variable-temperature unit-cell parameters of **1**.

|              | Fitting equations                    | $R^2$  | Deduced parameters at $T_1$                   |
|--------------|--------------------------------------|--------|-----------------------------------------------|
| <b>1_LTP</b> | $a/\text{Å} = 0.00194T + 8.0707$     | 0.9972 | $a = 8.6798 \text{ Å}$                        |
|              | $b/\text{Å} = 0.00141T + 9.3400$     | 0.9936 | $b = 9.7827 \text{ Å}$                        |
|              | $c/\text{Å} = 0.00134T + 13.6732$    | 0.9872 | $c = 14.0939 \text{ Å}$                       |
|              | $\beta/^\circ = -0.0126T + 98.5248$  | 0.9349 | $\beta = 94.5652^\circ$                       |
|              | $V/\text{Å}^3 = 0.5712T + 1013.9270$ | 0.9973 | $V = 1193.28 \text{ Å}^3$                     |
| <b>1_HTP</b> | $a/\text{Å} = 0.00156T + 8.2700$     | 0.9969 | $a = 8.7599 \text{ Å}$                        |
|              | $c/\text{Å} = 0.00143T + 9.4070$     | 0.9722 | $b = 9.8560 \text{ Å}$                        |
|              | $b/\text{Å} = 0.00097T + 13.5876$    | 0.9800 | $c = 13.8909 \text{ Å}$<br>$\beta = 90^\circ$ |
|              | $V/\text{Å}^3 = 0.4720T + 1050.8520$ | 0.9920 | $V = 1199.06 \text{ Å}^3$                     |

**Table S4.** Linear fitting results of the variable-temperature unit-cell parameters of **2**.

|              | Fitting equations                     | $R^2$  | Deduced parameters at $T_2$                   |
|--------------|---------------------------------------|--------|-----------------------------------------------|
| <b>2_LTP</b> | $a/\text{Å} = 0.00248T + 16.4776$     | 0.9977 | $a = 17.3208 \text{ Å}$                       |
|              | $b/\text{Å} = 0.000643T + 9.4926$     | 0.9975 | $b = 9.7112 \text{ Å}$                        |
|              | $c/\text{Å} = 0.000779T + 13.8311$    | 0.9941 | $c = 14.0961 \text{ Å}$<br>$\beta = 90^\circ$ |
|              | $V/\text{Å}^3 = 0.6258T + 2158.1969$  | 0.9983 | $V = 2370.96 \text{ Å}^3$                     |
| <b>2_HTP</b> | $a/\text{Å} = 0.00293T + 7.7218$      | 0.9835 | $a = 8.7180 \text{ Å}$                        |
|              | $b/\text{Å} = 0.00216T + 8.9564$      | 0.9868 | $b = 9.6908 \text{ Å}$                        |
|              | $c/\text{Å} = 0.00123T + 13.5958$     | 0.9956 | $c = 14.0140 \text{ Å}$                       |
|              | $\beta/^\circ = -0.02097T + 102.0780$ | 0.9834 | $\beta = 94.9482^\circ$                       |
|              | $V/\text{Å}^3 = 0.8023T + 906.5326$   | 0.9980 | $V = 1179.3044 \text{ Å}^3$                   |



**Table S5.** Thermal expansion coefficients of the principal axes in **1**.

|              | <i>T</i> / K | Principle axis | Directions   |              |              | $\alpha$ /mk <sup>-1</sup> | $\beta_v$ /mk <sup>-1</sup> |
|--------------|--------------|----------------|--------------|--------------|--------------|----------------------------|-----------------------------|
|              |              |                | <i>a</i> / Å | <i>b</i> / Å | <i>c</i> / Å |                            |                             |
| <b>1_LTP</b> | 273-308      | X <sub>1</sub> | 0.6112       | -0.0000      | -0.7914      | 41(11)                     | 488(8)                      |
|              |              | X <sub>2</sub> | 0.0000       | -1.0000      | -0.0000      | 144(4)                     |                             |
|              |              | X <sub>3</sub> | 0.9496       | -0.0000      | 0.3135       | 299(12)                    |                             |
| <b>1_HTP</b> | 318-338      | X <sub>1</sub> | 0.0000       | 0.0000       | 1.0000       | 69(3)                      | 394(12)                     |
|              |              | X <sub>2</sub> | 0.0000       | 1.0000       | -0.0000      | 147(7)                     |                             |
|              |              | X <sub>3</sub> | -1.0000      | 0.0000       | 0.0000       | 174(6)                     |                             |

**Table S6.** Thermal expansion coefficients of the principal axes in **2**.

|              | <i>T</i> / K | Principle axis | Directions   |              |              | $\alpha$ /MK <sup>-1</sup> | $\beta_v$ /MK <sup>-1</sup> |
|--------------|--------------|----------------|--------------|--------------|--------------|----------------------------|-----------------------------|
|              |              |                | <i>a</i> / Å | <i>b</i> / Å | <i>c</i> / Å |                            |                             |
| <b>2_LTP</b> | 303-338      | X <sub>1</sub> | 0.0000       | 0.0000       | 1.0000       | 56(1)                      | 267(2)                      |
|              |              | X <sub>2</sub> | 0.0000       | 1.0000       | -0.0000      | 66(1)                      |                             |
|              |              | X <sub>3</sub> | -1.0000      | 0.0000       | 0.0000       | 144(2)                     |                             |
| <b>2_HTP</b> | 348-363      | X <sub>1</sub> | 0.6296       | -0.0000      | -0.7769      | 4(3)                       | 678(13)                     |
|              |              | X <sub>2</sub> | 0.0000       | -1.0000      | 0.0000       | 222(9)                     |                             |
|              |              | X <sub>3</sub> | 0.9433       | -0.0000      | 0.3320       | 448(23)                    |                             |

**Table S7.** Selected bond lengths (Å) and bond angles (°) for **1** at **LTP** and **HTP**.

|                |                |           |                |            |
|----------------|----------------|-----------|----------------|------------|
| <b>1_LTP</b>   | Te1-Br3        | 2.721(3)  | Te1-Br6        | 2.689(2)   |
|                | Te1-Br4        | 2.670(2)  | Te1-Br7        | 2.736(2)   |
|                | Te1-Br5        | 2.679(2)  | Te1-Br8        | 2.695(2)   |
|                | ∠ Br3-Te1-Br7  | 90.49(8)  | ∠ Br5-Te1-Br7  | 92.22(7)   |
|                | ∠ Br4-Te1-Br3  | 87.24(8)  | ∠ Br5-Te1-Br8  | 89.89(7)   |
|                | ∠ Br4-Te1-Br5  | 90.01(7)  | ∠ Br6-Te1-Br3  | 92.44(9)   |
|                | ∠ Br4-Te1-Br6  | 91.21(8)  | ∠ Br6-Te1-Br7  | 90.81(8)   |
|                | ∠ Br4-Te1-Br7  | 177.02(8) | ∠ Br6-Te1-Br8  | 177.25(9)  |
|                | ∠ Br4-Te1-Br8  | 91.21(7)  | ∠ Br8-Te1-Br3  | 88.98(8)   |
|                | ∠ Br5-Te1-Br3  | 177.01(9) | ∠ Br8-Te1-Br7  | 86.82(7)   |
|                | ∠ Br5-Te1-Br6  | 88.80(8)  |                |            |
| <b>1_HTP</b>   | Te1-Br3        | 2.664(5)  | Te1-Br5        | 2.724(7)   |
|                | Te1-Br4        | 2.734(3)  | Te1-Br6        | 2.647(4)   |
|                | ∠ Br3-Te1-Br4  | 89.63(10) | ∠ Br6-Te1-Br4A | 90.10(15)  |
|                | ∠ Br3-Te1-Br5  | 177.7(2)  | ∠ Br6-Te1-Br4  | 178.84(16) |
|                | ∠ Br4-Te1-Br4A | 90.99(15) | ∠ Br6-Te1-Br5  | 90.86(19)  |
|                | ∠ Br5-Te1-Br4  | 88.77(14) | ∠ Br6-Te1-Br6A | 88.8(3)    |
|                | ∠ Br6-Te1-Br3  | 90.77(16) |                |            |
| A) 1-x, +y, +z |                |           |                |            |

**Table S8.** Selected bond lengths (Å) and bond angles (°) for **2** at **LTP** and **HTP**.

|              |               |            |               |            |
|--------------|---------------|------------|---------------|------------|
| <b>2_LTP</b> | Sn1-Br3       | 2.617(1)   | Sn1-Br6       | 2.586(1)   |
|              | Sn1-Br4       | 2.600(1)   | Sn1-Br7       | 2.596(1)   |
|              | Sn1-Br5       | 2.581(1)   | Sn1-Br8       | 2.619(1)   |
|              | ∠ Br3-Sn1-Br8 | 87.79(4)   | ∠ Br5-Sn1-Br8 | 176.96(5)  |
|              | ∠ Br4-Sn1-Br3 | 90.35(4)   | ∠ Br6-Sn1-Br3 | 177.22(5)  |
|              | ∠ Br4-Sn1-Br8 | 90.37(3)   | ∠ Br6-Sn1-Br4 | 88.76(4)   |
|              | ∠ Br5-Sn1-Br3 | 89.30(4)   | ∠ Br6-Sn1-Br7 | 90.44(5)   |
|              | ∠ Br5-Sn1-Br4 | 90.53(4)   | ∠ Br6-Sn1-Br8 | 89.58(4)   |
|              | ∠ Br5-Sn1-Br6 | 93.34(5)   | ∠ Br7-Sn1-Br3 | 90.38(5)   |
|              | ∠ Br5-Sn1-Br7 | 90.87(4)   | ∠ Br7-Sn1-Br4 | 178.43(4)  |
|              | ∠ Br7-Sn1-Br8 | 88.26(4)   |               |            |
| <b>2_HTP</b> | Sn1-Br3       | 2.597(4)   | Sn1-Br6       | 2.613(4)   |
|              | Sn1-Br4       | 2.601(4)   | Sn1-Br7       | 2.604(4)   |
|              | Sn1-Br5       | 2.587(4)   | Sn1-Br8       | 2.604(4)   |
|              | ∠ Br3-Sn1-Br4 | 89.97(12)  | ∠ Br5-Sn1-Br3 | 89.65(14)  |
|              | ∠ Br3-Sn1-Br6 | 178.01(17) | ∠ Br5-Sn1-Br4 | 91.13(13)  |
|              | ∠ Br3-Sn1-Br7 | 91.49(14)  | ∠ Br5-Sn1-Br6 | 91.46(17)  |
|              | ∠ Br3-Sn1-Br8 | 89.57(13)  | ∠ Br5-Sn1-Br7 | 89.89(15)  |
|              | ∠ Br4-Sn1-Br6 | 88.36(15)  | ∠ Br5-Sn1-Br8 | 177.70(16) |
|              | ∠ Br4-Sn1-Br7 | 178.23(17) | ∠ Br7-Sn1-Br6 | 90.17(17)  |
|              | ∠ Br4-Sn1-Br8 | 91.03(13)  | ∠ Br7-Sn1-Br8 | 87.97(14)  |
|              | ∠ Br8-Sn1-Br6 | 89.39(16)  |               |            |

**Table S9.** Calculated polarization intensity along the *b* axis for **1** and **2** by point charge model.<sup>S1, S2</sup>

| Compound     | Polarization Intensity (C/m <sup>2</sup> ) |
|--------------|--------------------------------------------|
| <b>1_LTP</b> | 3.17×10 <sup>-3</sup>                      |
| <b>1_HTP</b> | -8.95×10 <sup>-2</sup>                     |
| <b>2_LTP</b> | -3.15×10 <sup>-2</sup>                     |
| <b>2_HTP</b> | 4.40×10 <sup>-1</sup>                      |

### The equations for calculation of the spontaneous strain.

The spontaneous strain tensors can be given as: <sup>S3, S4</sup>

For *mm2*F2:

$$\varepsilon_{ij} = \begin{bmatrix} \frac{a_{1\_LTP}}{a_{1\_HTP}} - 1 & 0 & \frac{1}{2} \left( \frac{c_{1\_LTP}}{c_{1\_HTP}} \cos \beta \right) \\ 0 & \frac{b_{1\_LTP}}{b_{1\_HTP}} - 1 & 0 \\ \frac{1}{2} \left( \frac{c_{1\_LTP}}{c_{1\_HTP}} \cos \beta \right) & 0 & \frac{c_{1\_LTP}}{c_{1\_HTP}} \sin \beta - 1 \end{bmatrix} = 0.0594$$

For 222F2:

$$\varepsilon_{ij} = \begin{bmatrix} \frac{2a_{2\_HTP}}{a_{2\_LTP}} - 1 & 0 & \frac{1}{2} \left( \frac{c_{2\_HTP}}{c_{2\_LTP}} \cos \beta \right) \\ 0 & \frac{b_{2\_HTP}}{b_{2\_LTP}} - 1 & 0 \\ \frac{1}{2} \left( \frac{c_{2\_HTP}}{c_{2\_LTP}} \cos \beta \right) & 0 & \frac{c_{2\_HTP}}{c_{2\_LTP}} \sin \beta - 1 \end{bmatrix} = 0.0618$$

### References:

- (S1) F. Jensen, *Phys. Chem. Chem. Phys.*, 2022, **24**, 1926-1943.
- (S2) G. G. Hall, *Chem. Phys. Lett.*, 1973, **20**, 501-503.
- (S3) K. Aizu, *J. Phys. Soc. Jpn.*, 1970, **28**, 706-716.
- (S4) J. Sapriel, *Phys. Rev. B*, 1975, **12**, 5128-5140.
